# Supplementary material
Source: Research Square preprint supplement (doi:10.21203/rs.3.rs-9247309/v1)
Supplement: Supplementary file 1 [file 1a6628e9cef55cbb55dab353.docx]

**
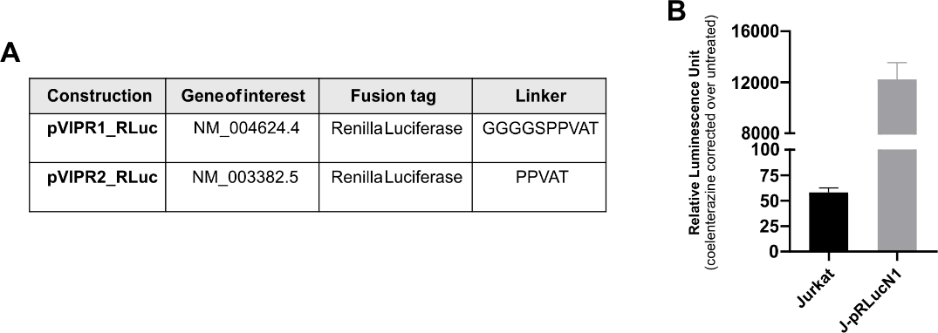
SUPPLEMENTARY DATA**

**Supplementary figure 1. Plasmid construction and luminescence measurements.** Name of each construction and nucleotide sequences of the linker used for each receptor **(A).** Comparison of luminescence intensity 2 min after substrate addition. HEK293 cells were transiently transfected with pR_LucN1, and total luminescence was measured 2 min after the addition of 5 µM coelenterazine H using a Fluostar Omega plate reader. RLU: Relative Luminescence Units.


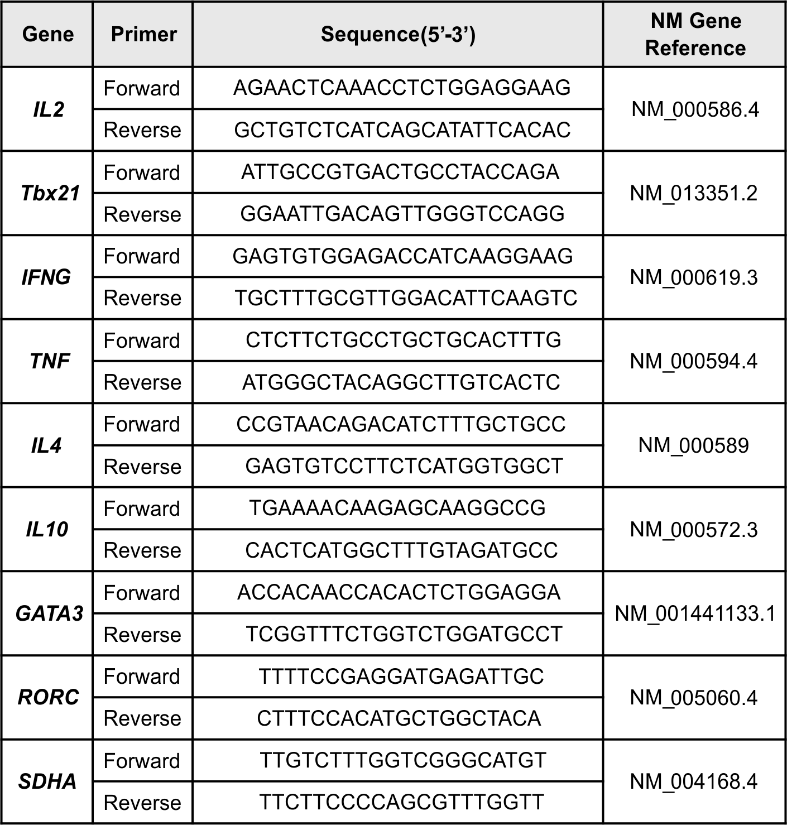


**Supplementary figure 2. Primer sequences.** Table showing the sequences of primers used for each gene analysed by qPCR. NM gene reference is also shown.


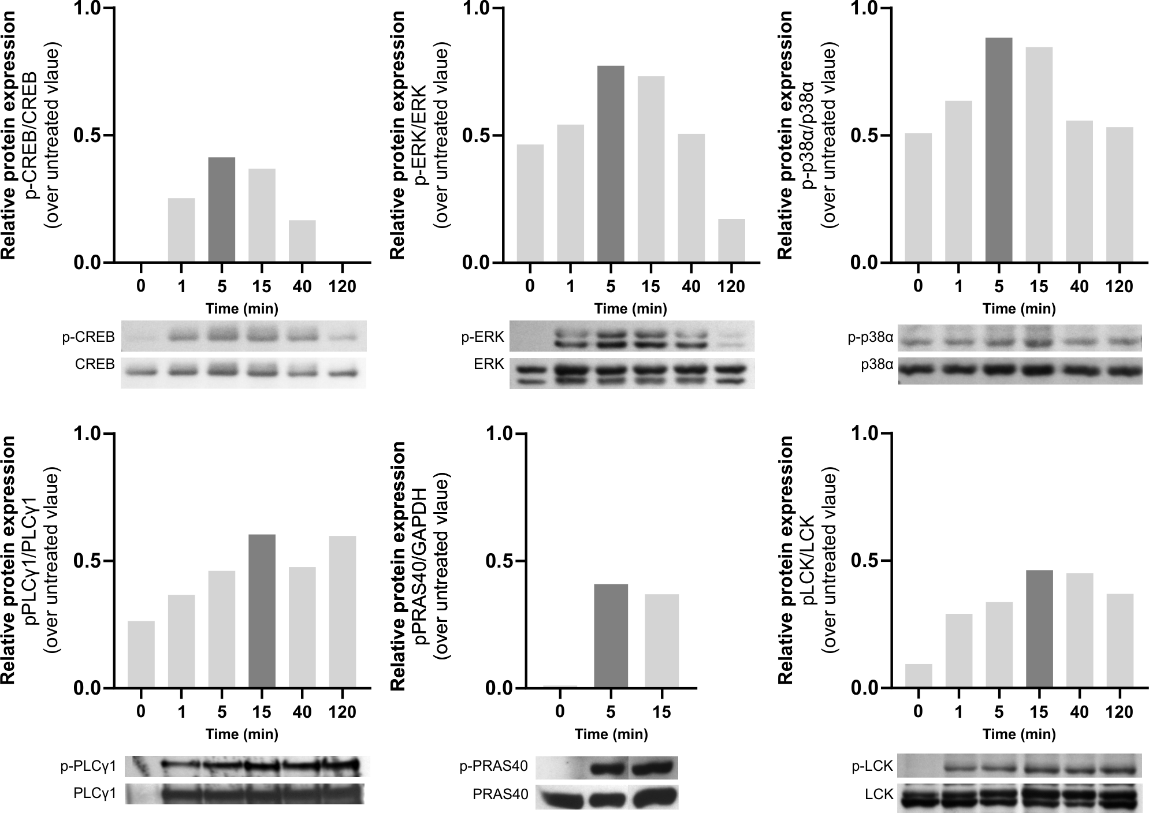


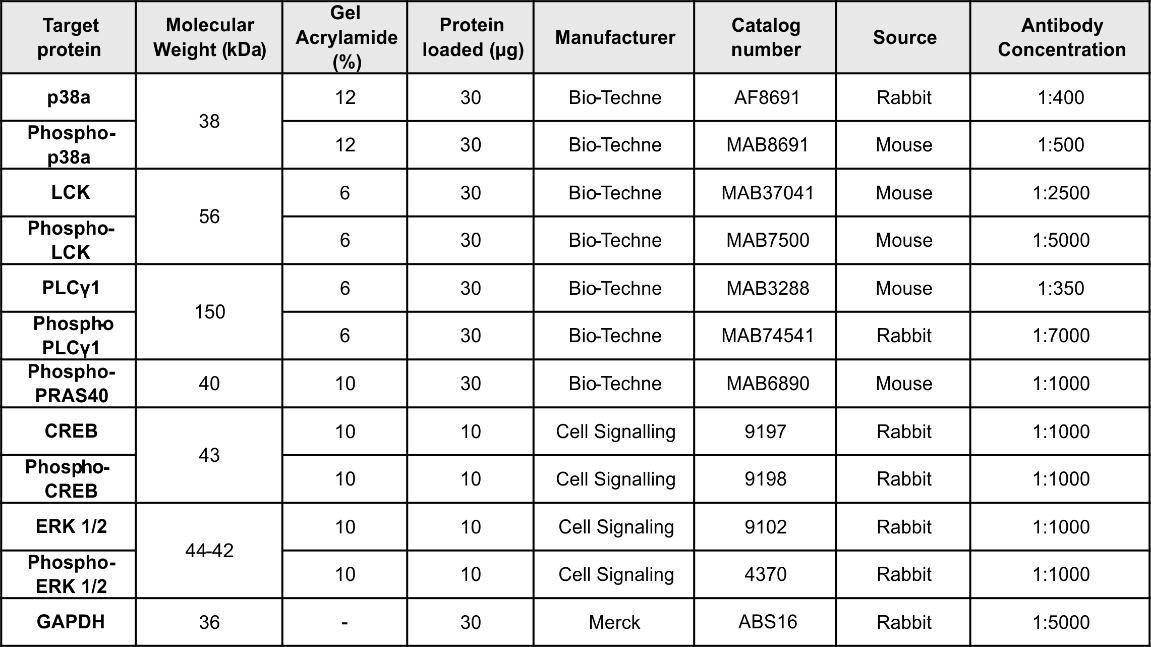
**Supplementary figure 3. Phosphorylation of intracellular kinases after VIP treatment.** Immunoblot analysis of phosphorylated CREB, ERK1/2, Lck, p38α, PLCγ1 and PRAS40 in Jurkat cell lysates after 1, 5, 15, 40 and 120 minutes of treatment with 10-8 M VIP. Non-phosphorylated proteins and GAPDH were used as loading controls. Graphs show the ratio of phosphorylated to non-phosphorylated protein.

**Supplementary figure 4. Western Blot antibodies.** Table listing all antibodies used for western blot analyses. The percentage of acrylamide used for each protein detection and the amount of protein loaded, as well as the antibody dilutions are shown.


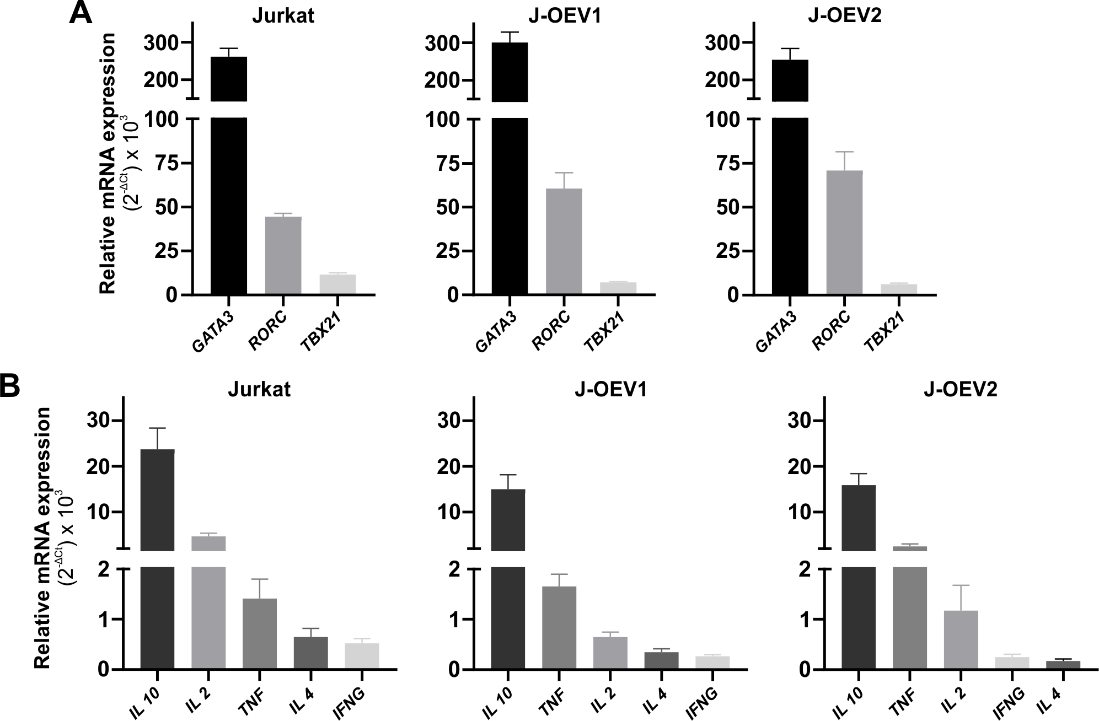


**Supplementary figure 5. Transcription factors and cytokines pattern in Jurkat cells.** mRNA expression of *TBX21, RORC and GATA3* transcription factors and *TNF, IFNG, IL10, IL4* and *IL2* cytokines was determined by semiquantitative real-time PCR analysis in Jurkat, J-OEV1 and J-OEV2 cells. Results are expressed as relative mRNA levels (normalized to SDHA mRNA levels, 2−ΔCt). The mean ± SEM of triplicate determination from five independent experiments are shown. Results are expressed as relative mRNA levels (normalized to SDHA mRNA levels, 2−ΔCt) in Jurkat cells.


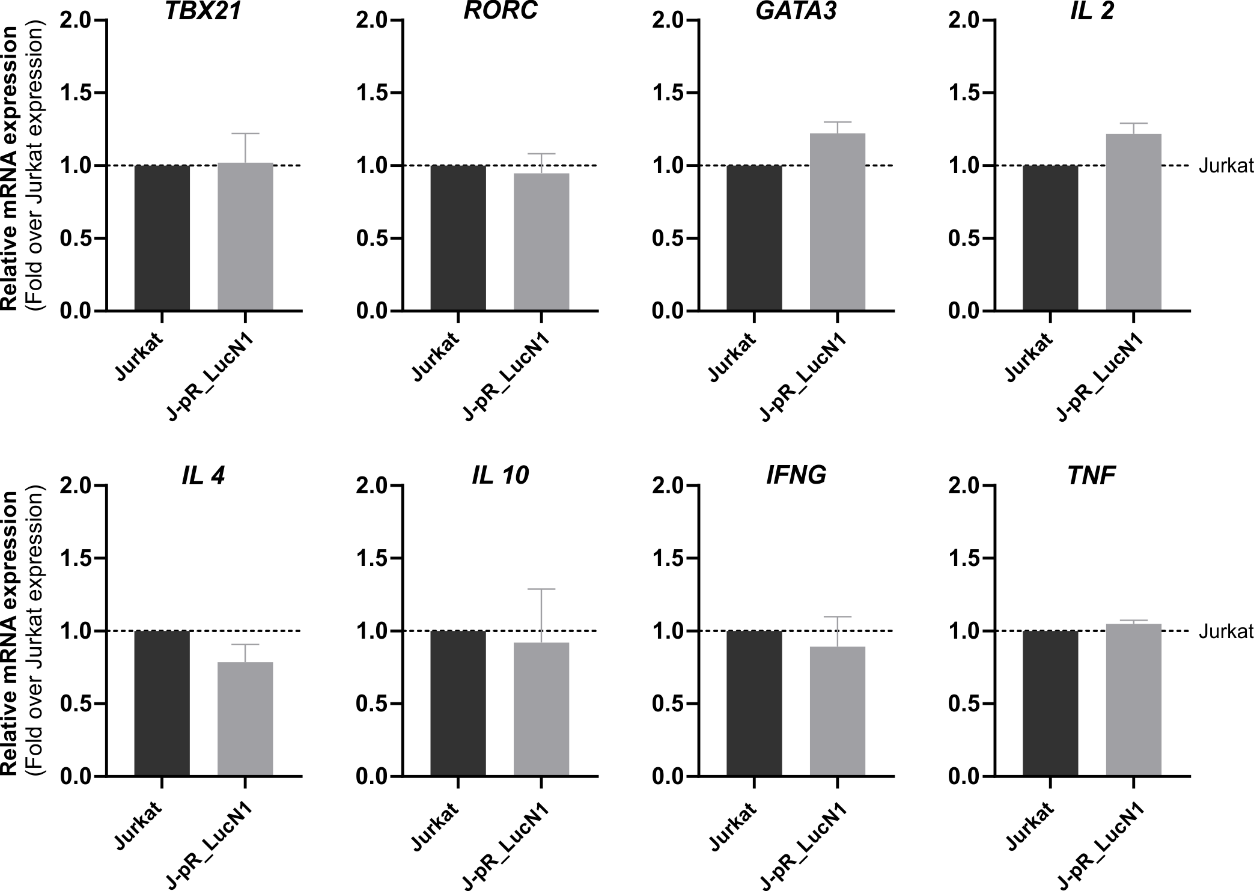


**Supplementary figure 6. Transcription factors and cytokines pattern in transfected Jurkat cells.** mRNA expression of the transcription factors *TBX21, RORC and GATA3*, as well as the cytokines *TNF, IFNG, IL10, TNF, IFNG, IL10, IL4* and *IL2* was determined by semiquantitative real-time PCR analysis in Jurkat and empty vector-transfected Jurkat cells. Results are expressed as relative mRNA levels normalized to SDHA mRNA levels (2−ΔCt). Data represent the mean ± SEM of triplicate determinations from one representative experiment.
